# Supplementary material for: Synthesis and structural characterization of l -prolinol derived chiral eutectic mixtures as sustainable solvents in asymmetric organocatalysis
Source: Royal Society of Chemistry journal article supplement (doi:10.1039/d3su00349c), 2023-12-21
Supplement: d3su00349c1.pdf [file d3su00349c1.pdf]

# Synthesis and Structure Characterization of L-Prolinol Derived Chiral Eutectic Mixtures as Sustainable Solvents in Asymmetric Organocatalysis

Jose A. Níguez,<sup>a</sup> Sarah J. Burlingham,<sup>a</sup> Rafael Chinchilla,<sup>\*a</sup> Juana M. Pérez,<sup>\*b</sup> Ignacio Fernández,<sup>\*b</sup> Diego A. Alonso<sup>\*a</sup>

<sup>a</sup> Department of Organic Chemistry and Institute of Organic Synthesis (ISO), University of Alicante, Apdo. 99, 03080 Alicante, Spain. E-mail: [diego.alonso@ua.es](mailto:diego.alonso@ua.es)

<sup>b</sup> Department of Chemistry and Physics, Research Centre CLAIMBITAL, University of Almería, Ctra. Sacramento s/n, 04120 Almería, Spain. E-mail: [ifernan@ual.es](mailto:ifernan@ual.es)

---

## Supplementary Information

### Table of contents

#### Table of Contents

|                                                                                                                                                                        |    |
|------------------------------------------------------------------------------------------------------------------------------------------------------------------------|----|
| 1. DSC diagrams .....                                                                                                                                                  | 1  |
| 1.1. L-Prolinol/TBAB mixtures .....                                                                                                                                    | 1  |
| 1.2. L-Prolinol/GA mixtures .....                                                                                                                                      | 1  |
| 2. IR spectra .....                                                                                                                                                    | 2  |
| 2.1. L-Prolinol/TBAB mixtures .....                                                                                                                                    | 2  |
| 2.2. L-Prolinol/GA mixtures .....                                                                                                                                      | 4  |
| 3. Selected <sup>1</sup> H-NMR spectra of crude reactions .....                                                                                                        | 5  |
| 3.1. L-Prolinol/GA 1/1 .....                                                                                                                                           | 5  |
| 3.2. L-Prolinol/GA 2/1 .....                                                                                                                                           | 6  |
| 3.3. L-Prolinol/TBAB 2/1 .....                                                                                                                                         | 6  |
| 3.4. L-Prolinol/TBAB 4/1 .....                                                                                                                                         | 7  |
| 3.5. Michael addition of ketones to β-nitrostyrenes employing L-Prolinol/GA 1/1 mixture in a 5/1 mass ratio of chiral mixture to reagents .....                        | 7  |
| 3.6. Scale-up of cyclohexanone to β-nitrostyrene Michael addition employing L-Prolinol/GA 1/1 mixture in a 5/1 mass ratio of chiral mixture to reagents. ....          | 9  |
| 3.7. Recycling studies of cyclohexanone to β-nitrostyrene Michael addition employing L-Prolinol/GA 1/1 mixture in a 5/1 mass ratio of chiral mixture to reagents. .... | 9  |
| 4. Chiral HPLC spectra of crude reaction mixtures. ....                                                                                                                | 12 |
| 4.1. (S)-2-((R)-2-nitro-1-phenylethyl)cyclohexanone (major product). <sup>1</sup> .....                                                                                | 12 |
| 4.2. (S)-2-((R)-1-(4-methoxyphenyl)-2-nitroethyl)cyclohexanone (major product). <sup>1</sup> .....                                                                     | 13 |

|                                                                                                                     |    |
|---------------------------------------------------------------------------------------------------------------------|----|
| 4.3. ( <i>S</i> )-2-(( <i>R</i> )-1-(4-chlorophenyl)-2-nitroethyl)cyclohexanone (major product). <sup>1</sup> ..... | 14 |
| 4.4. ( <i>S</i> )-2-(( <i>R</i> )-2-Nitro-1-phenyl-ethyl)-cyclohexanone (major product). <sup>1</sup> .....         | 15 |
| 5. In situ NMR mechanistic studies: Oxazolidine intermediate formation.....                                         | 16 |
| 6. References. ....                                                                                                 | 20 |

# 1. DSC diagrams

## 1.1. L-Prolinol/TBAB mixtures

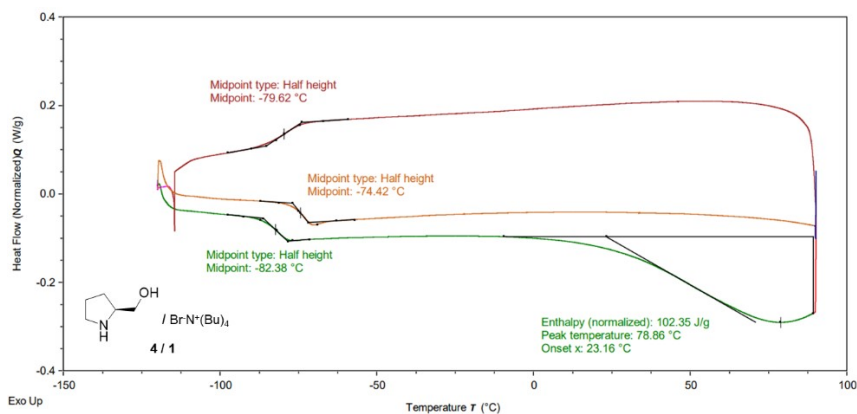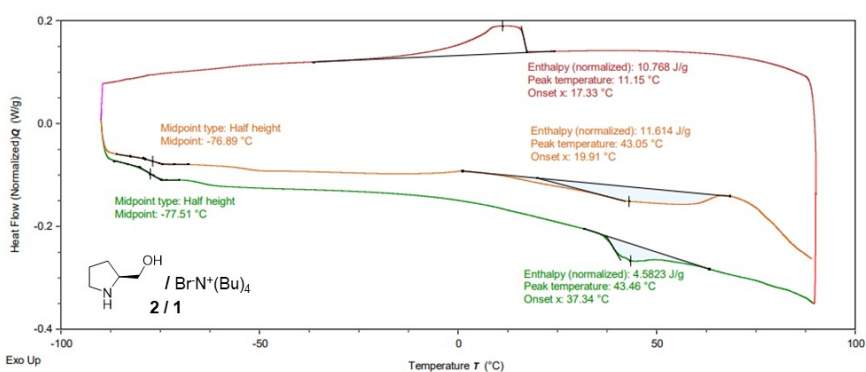

## 1.2. L-Prolinol/GA mixtures

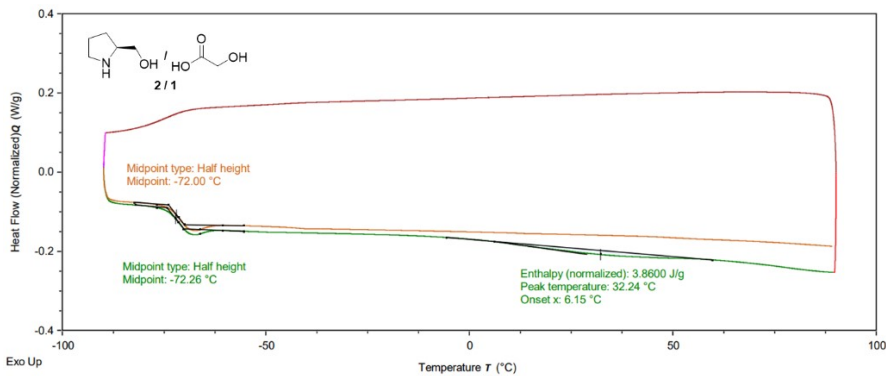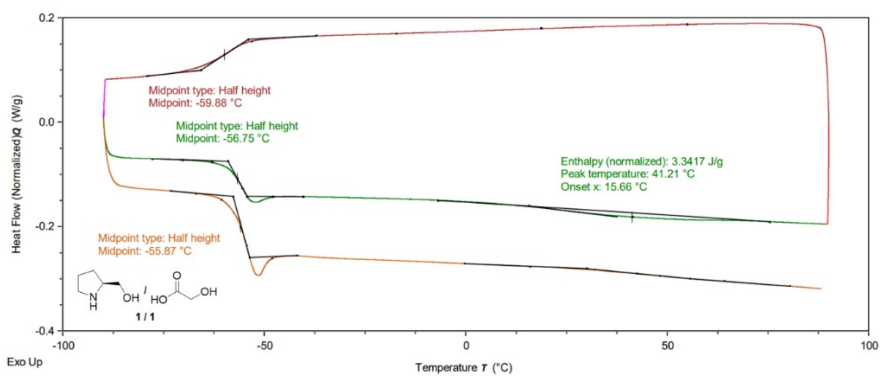

## 2. IR spectra

### 2.1. L-Prolinol/TBAB mixtures

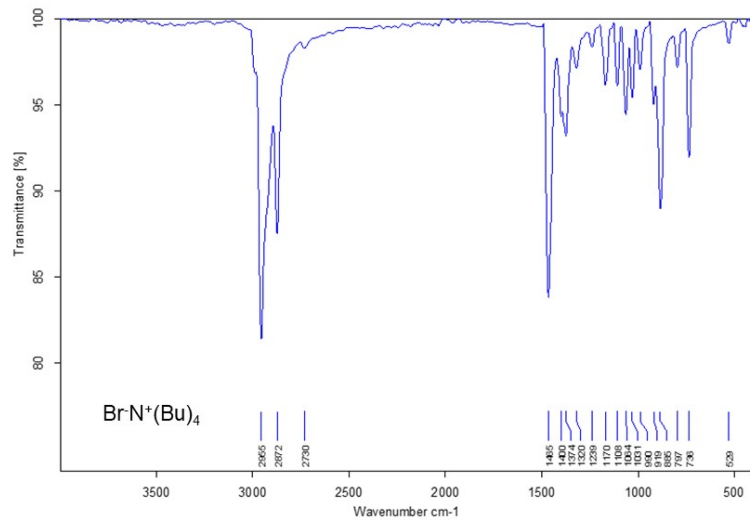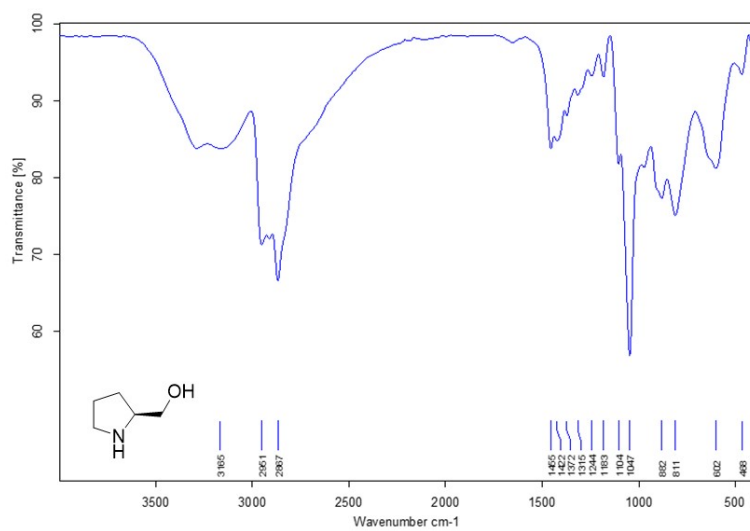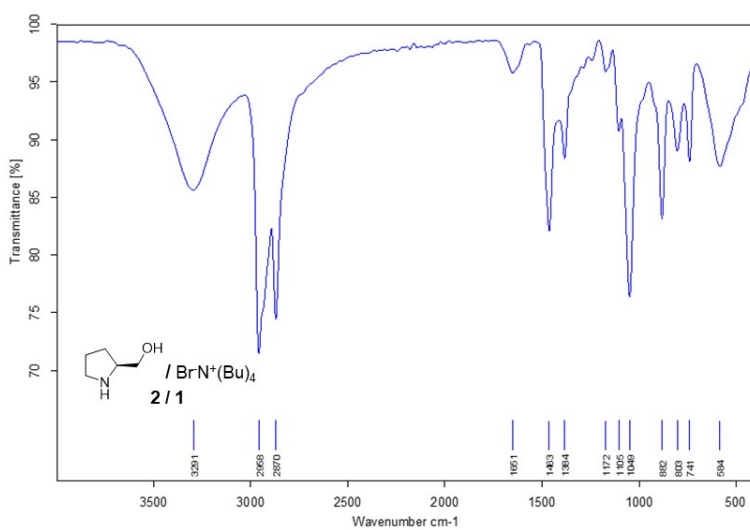

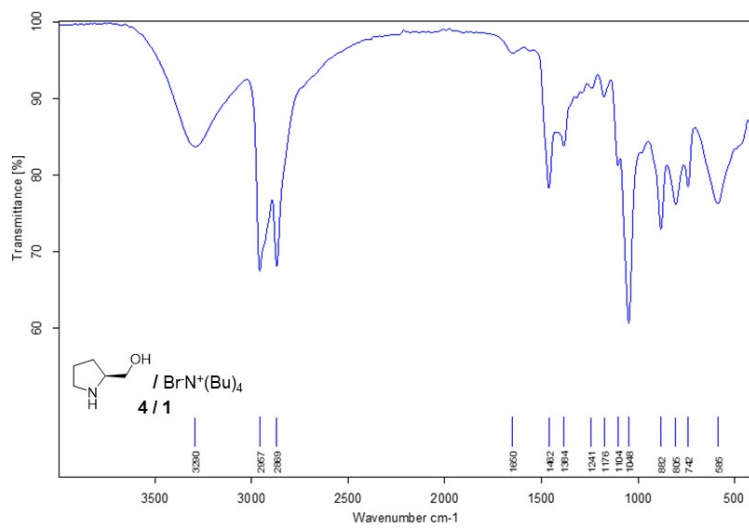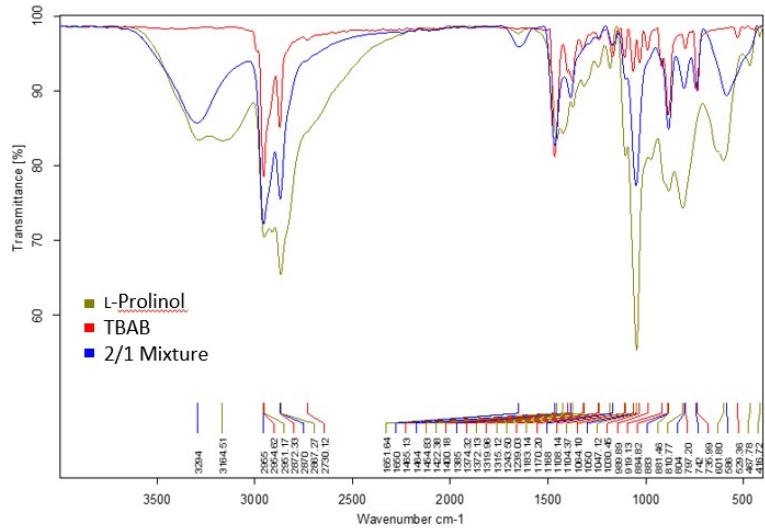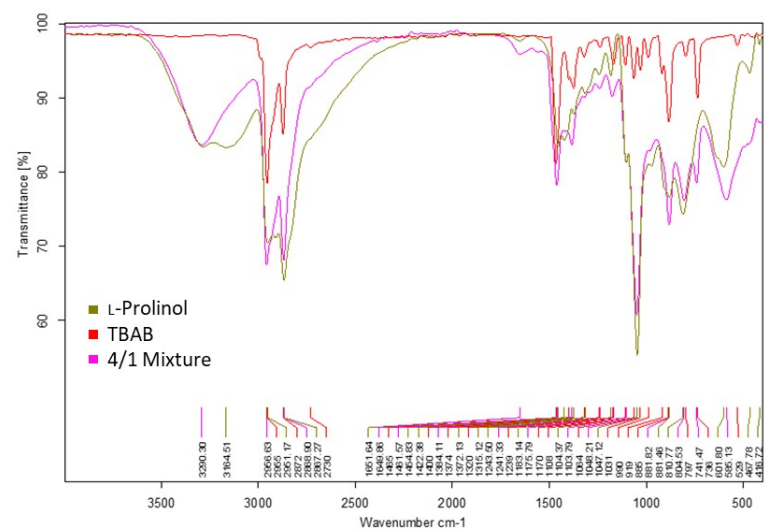

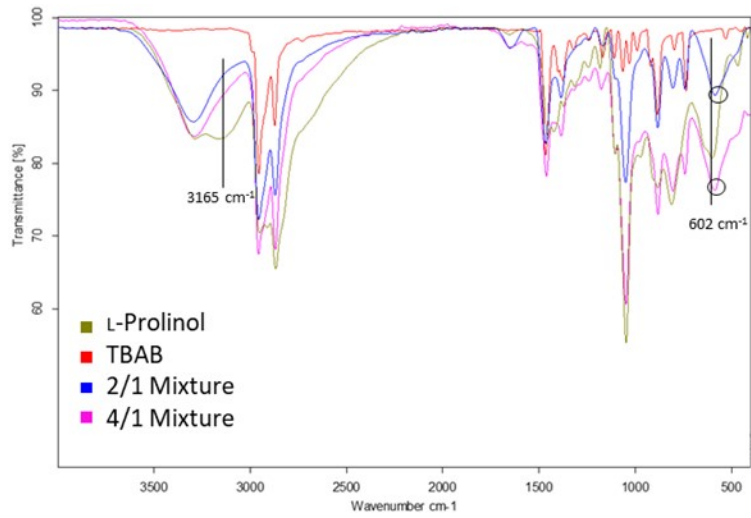

## 2.2. L-Prolinol/GA mixtures

Glycolic Acid

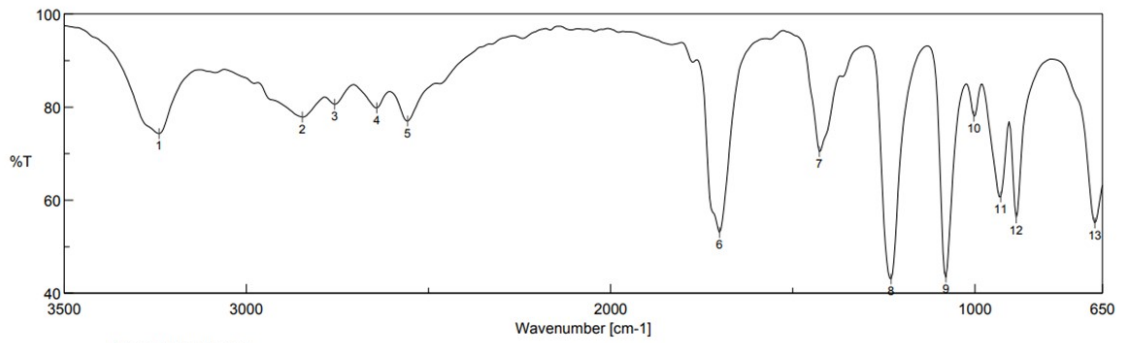

[ Result of Peak Picking ]

| No. | Position | Intensity |
|-----|----------|-----------|-----|----------|-----------|-----|----------|-----------|-----|----------|-----------|-----|----------|-----------|
| 1   | 3239.82  | 74.29     | 3   | 2757.71  | 80.59     | 7   | 1427.07  | 70.40     | 10  | 2557.15  | 76.96     |     |          |           |
| 6   | 1700.91  | 53.01     | 8   | 1230.36  | 43.07     | 11  | 929.521  | 60.66     | 9   | 1079.94  | 43.44     | 12  | 887.095  | 56.17     |
|     |          |           | 13  | 671.106  | 55.09     |     |          |           |     |          |           |     |          |           |

L-Prolinol-GA 2:1

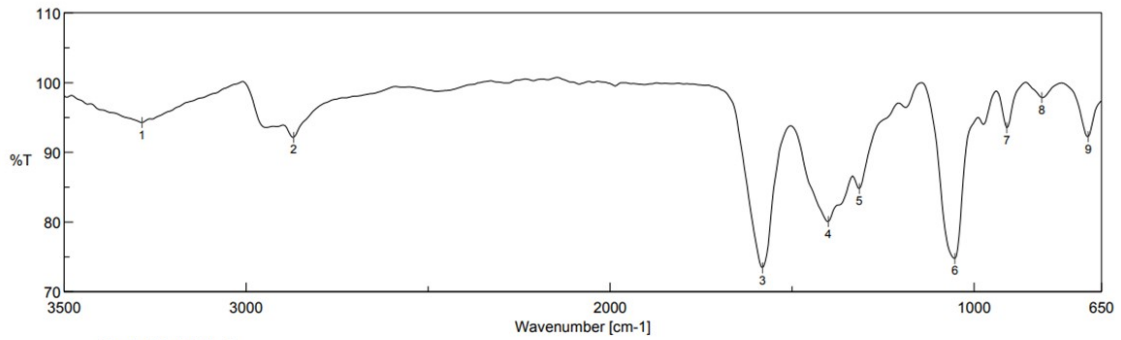

[ Result of Peak Picking ]

| No. | Position | Intensity |
|-----|----------|-----------|-----|----------|-----------|-----|----------|-----------|-----|----------|-----------|-----|----------|-----------|
| 1   | 3286.11  | 94.26     | 3   | 1581.34  | 73.42     | 7   | 910.236  | 93.50     | 10  | 1315.21  | 84.77     |     |          |           |
| 6   | 1052.94  | 74.75     | 8   | 813.813  | 97.83     | 11  | 686.534  | 92.23     | 9   | 686.534  | 92.23     |     |          |           |

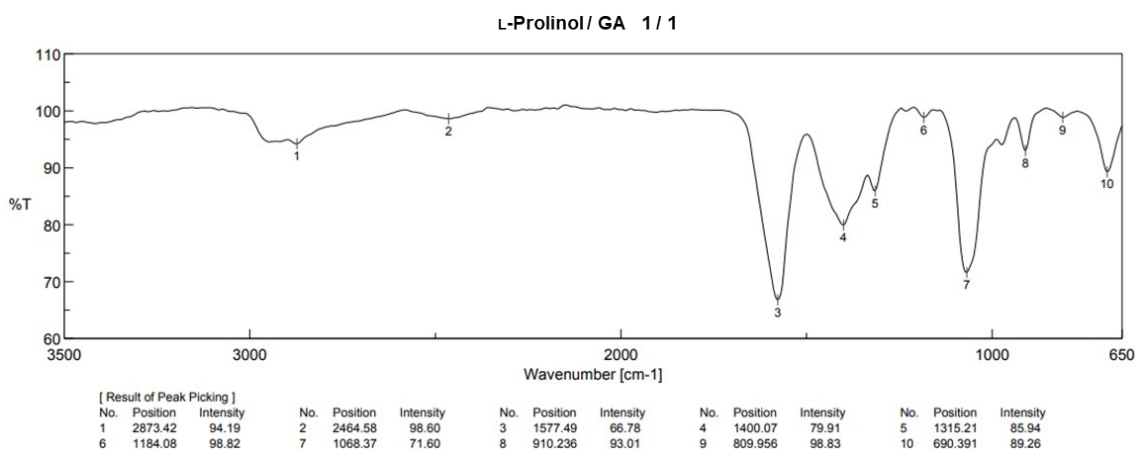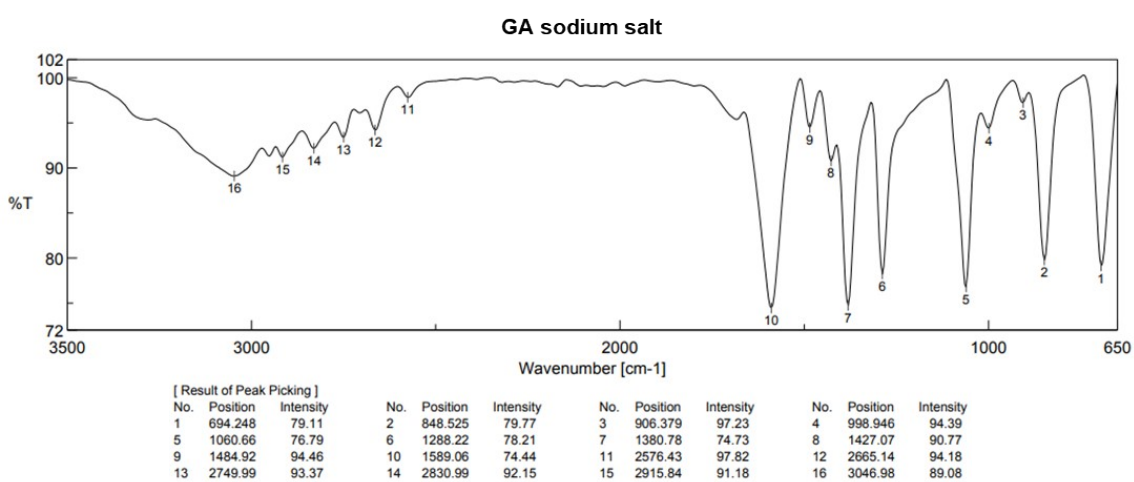

### 3. Selected <sup>1</sup>H-NMR spectra of crude reactions

#### 3.1. L-Prolinol/GA 1/1

L-Prolinol/GA 1/1  
Mixture/Reagents 5/1

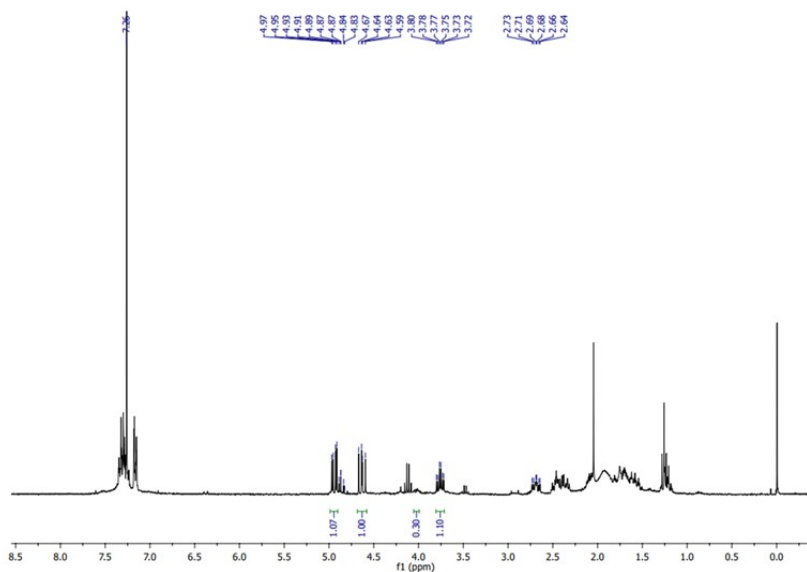

### 3.2. L-Prolinol/GA 2/1

L-Prolinol/GA 2/1  
Mixture/Reagents 5/1

4.97  
4.93  
4.89  
4.85  
4.81  
4.77  
4.73

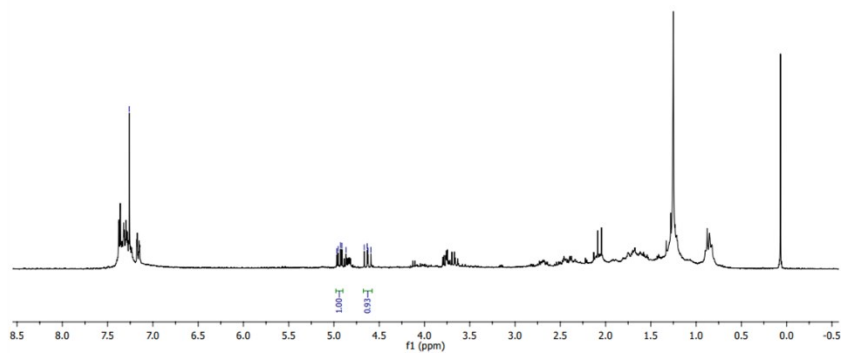

### 3.3. L-Prolinol/TBAB 2/1

L-Prolinol/TBAB 2/1  
Mixture/Reagents 3/1

4.97  
4.93  
4.89  
4.85  
4.81  
4.77  
4.73

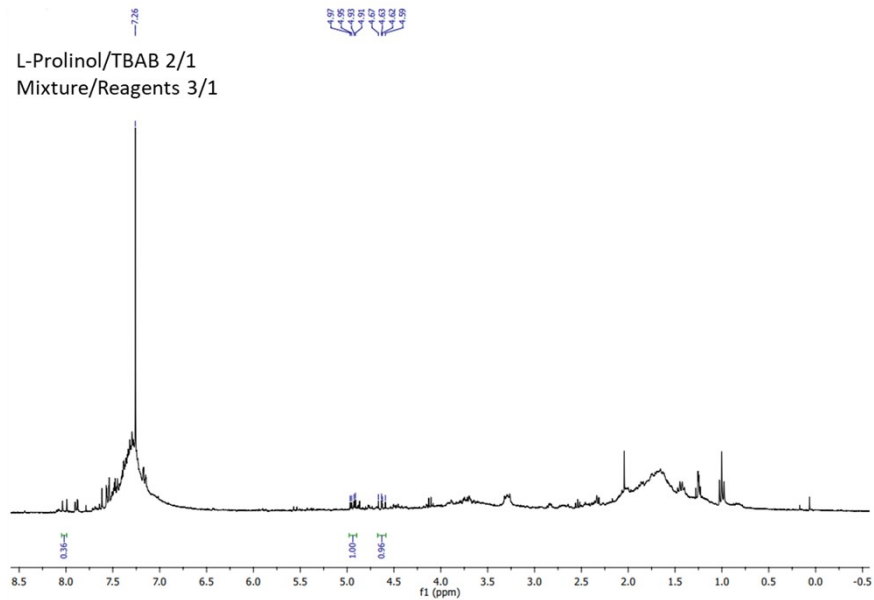



### 3.4. L-Prolinol/TBAB 4/1

L-Prolinol/TBAB 4/1  
Mixture/Reagents 3/1

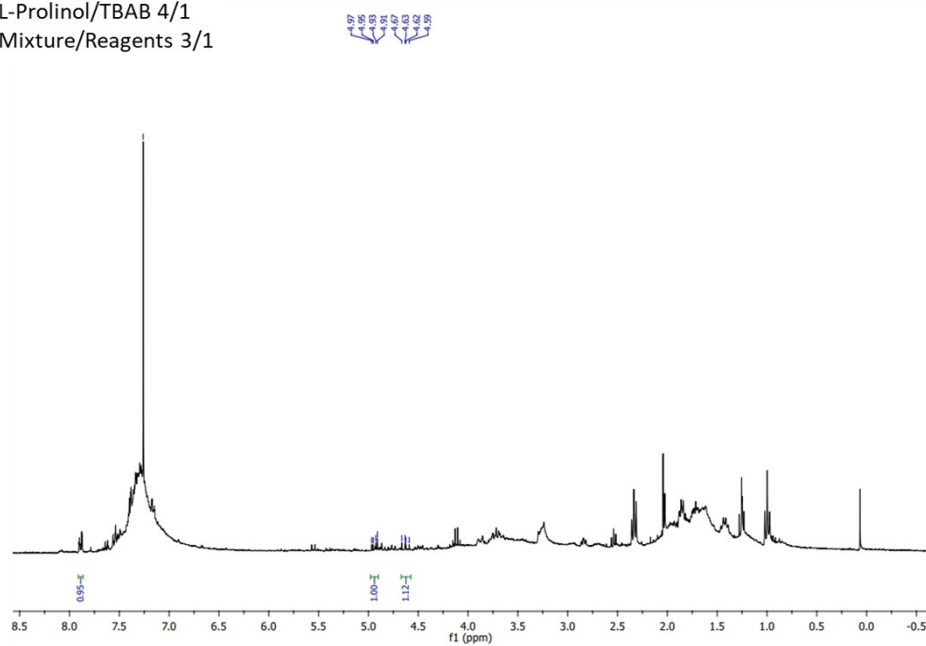

### 3.5. Michael addition of ketones to b-nitrostyrenes employing L-Prolinol/GA 1/1 mixture in a 5/1 mass ratio of chiral mixture to reagents

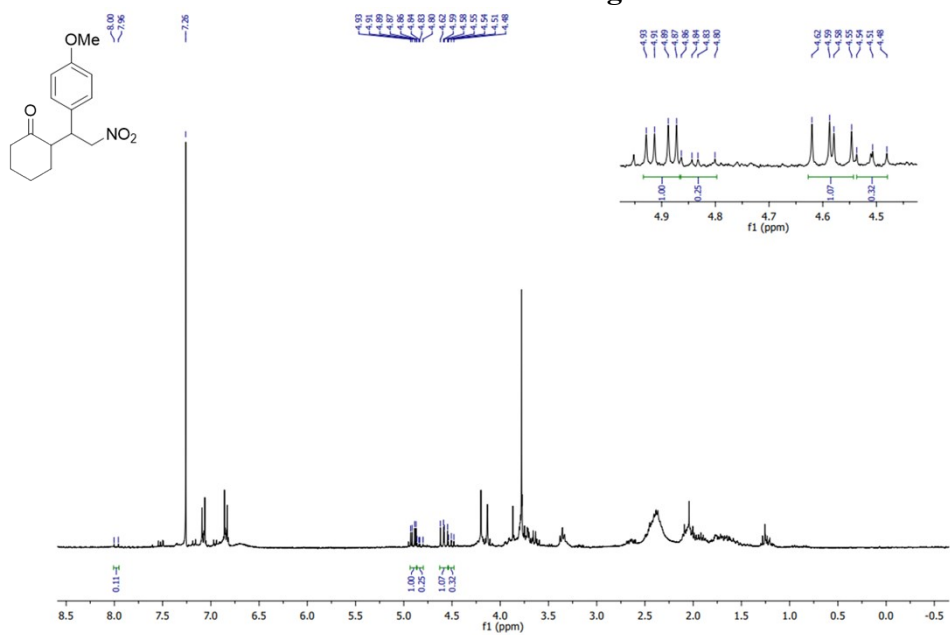

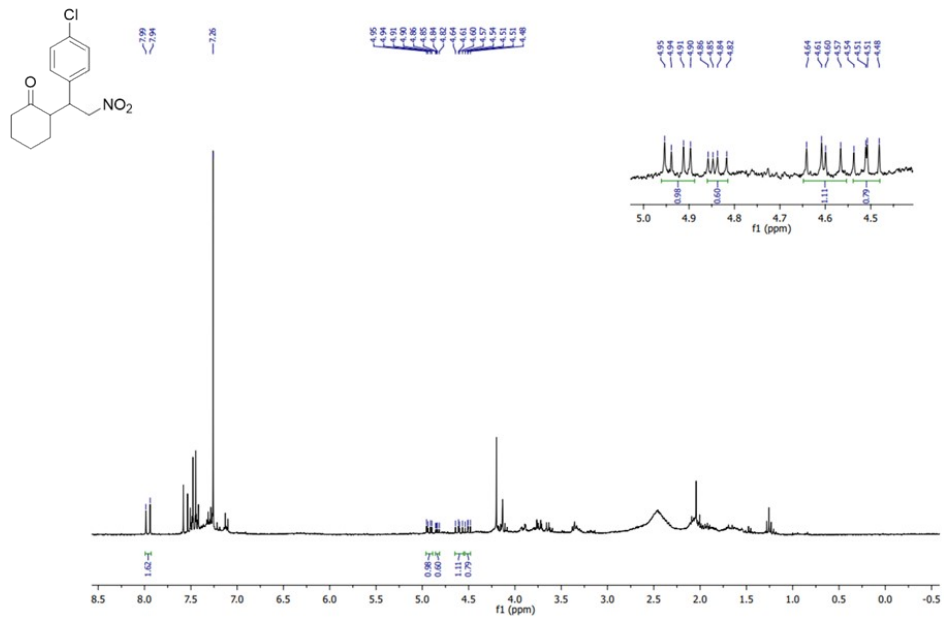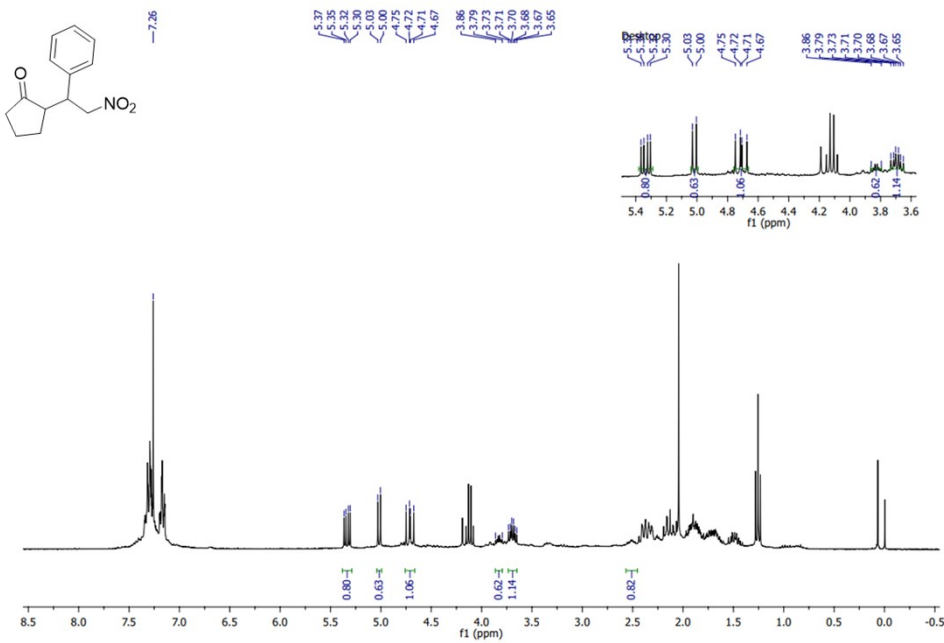

**3.6. Scale-up of cyclohexanone to  $\beta$ -nitrostyrene Michael addition employing L-Prolinol/GA 1/1 mixture in a 5/1 mass ratio of chiral mixture to reagents.**

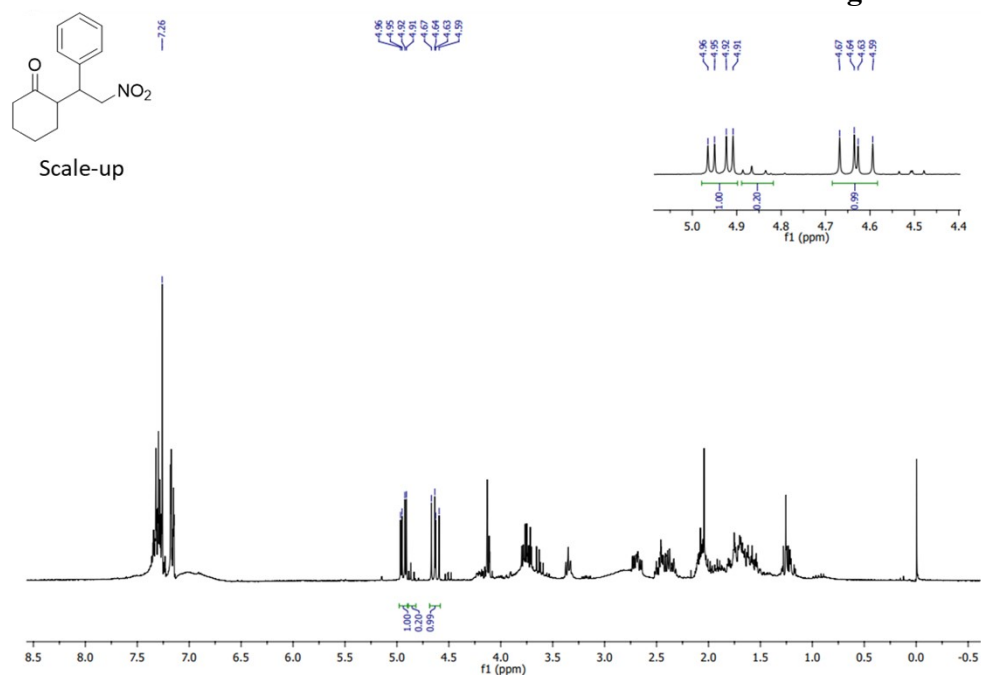

**3.7. Recycling studies of cyclohexanone to  $\beta$ -nitrostyrene Michael addition employing L-Prolinol/GA 1/1 mixture in a 5/1 mass ratio of chiral mixture to reagents.**

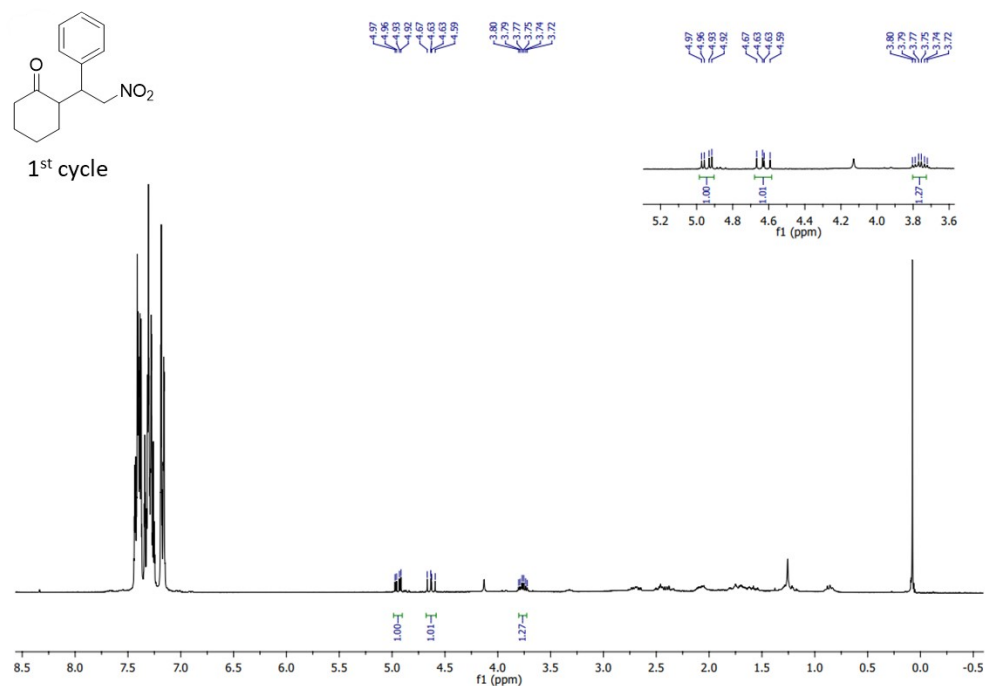

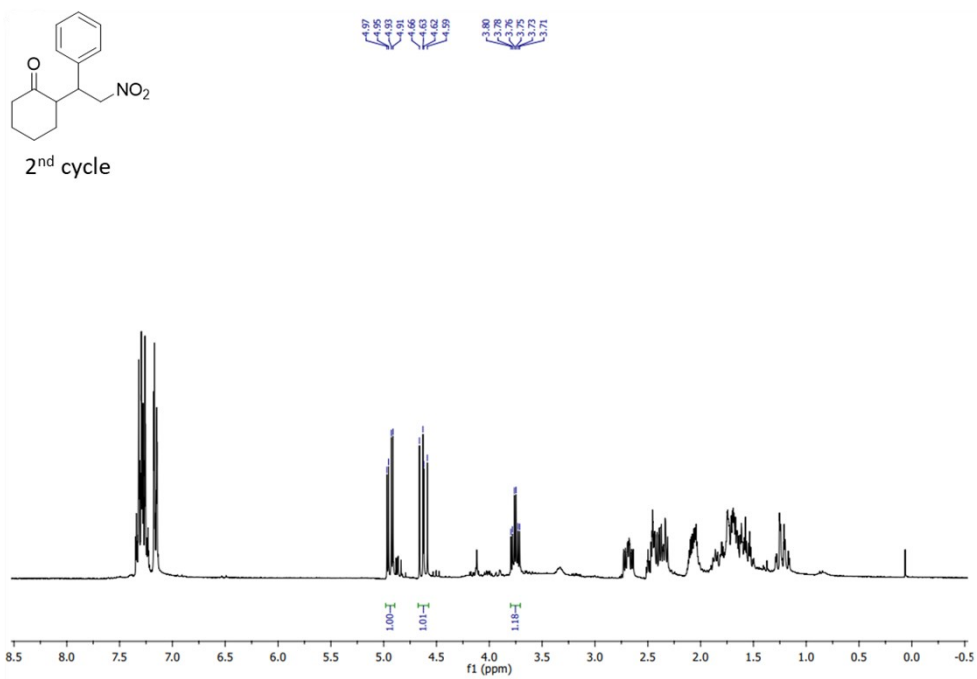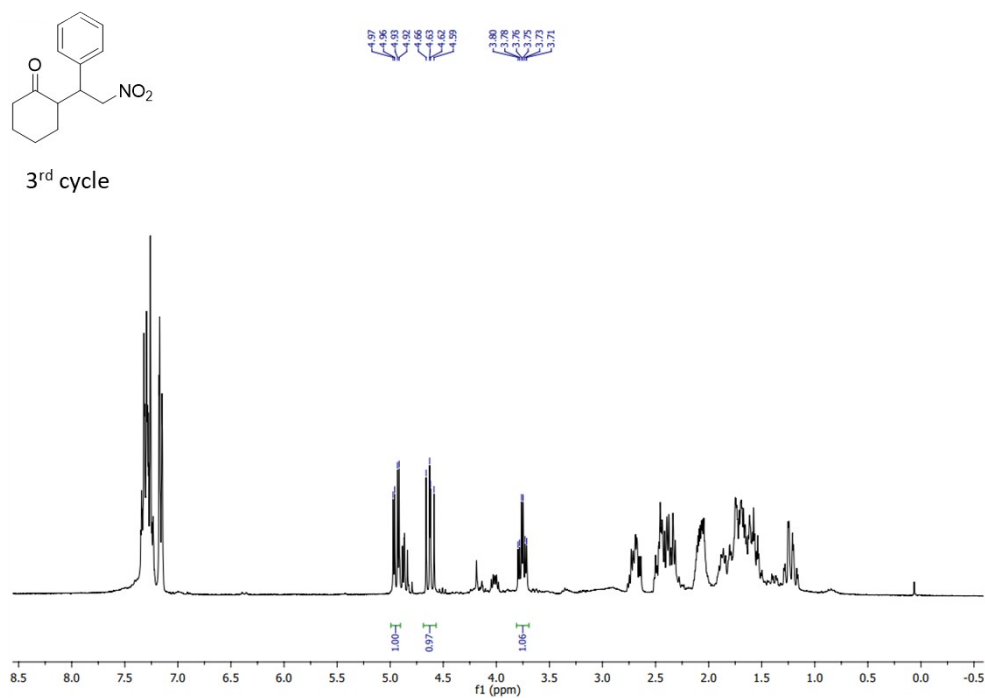

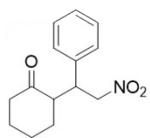

4<sup>th</sup> cycle

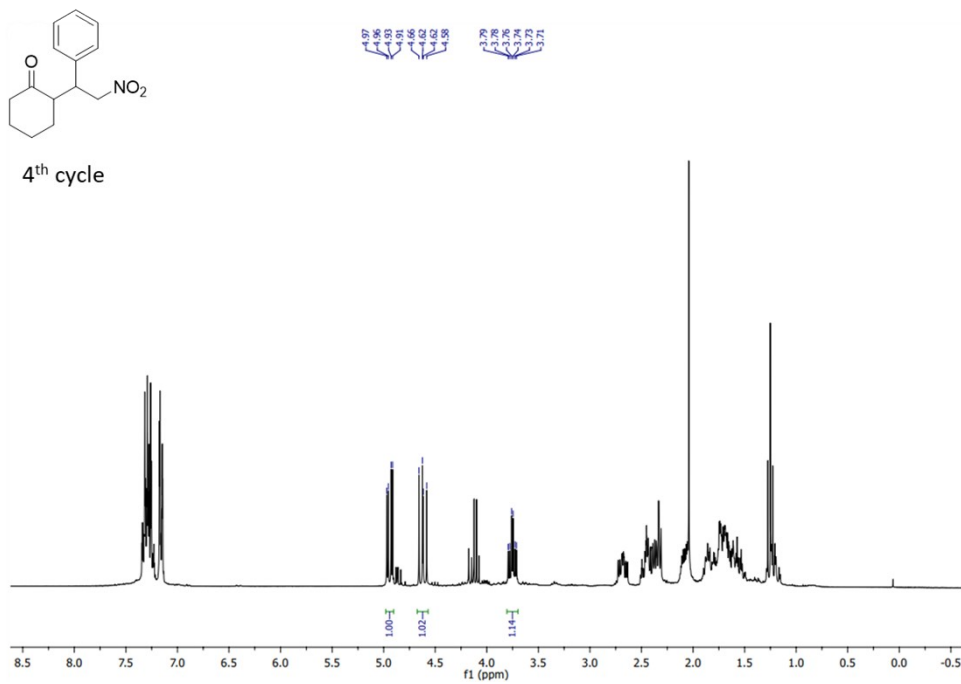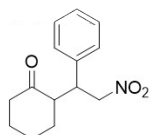

5<sup>th</sup> cycle

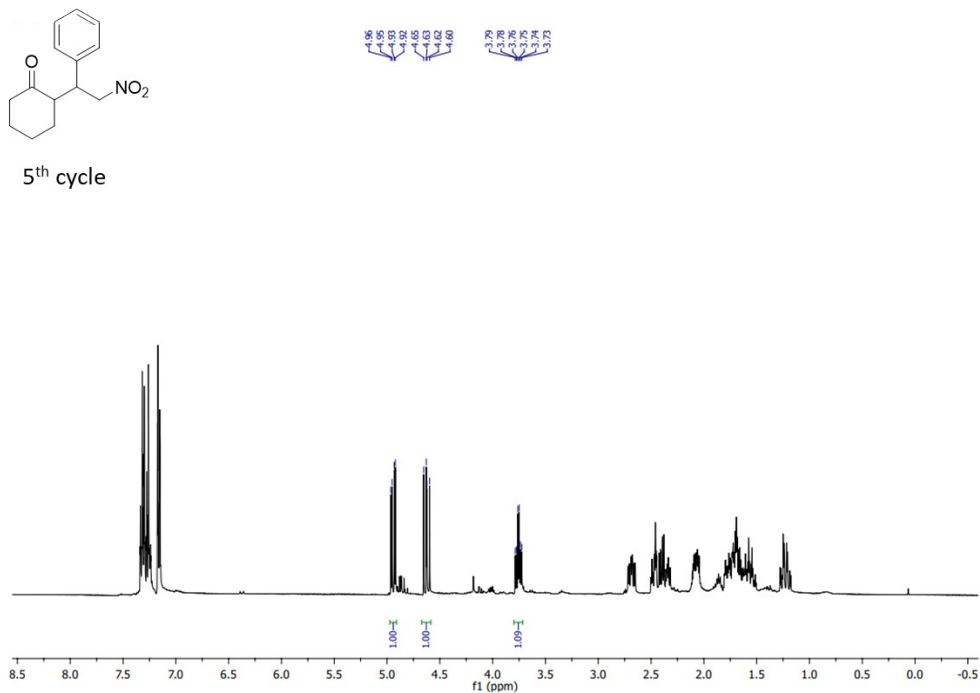

## 4. Chiral HPLC spectra of crude reaction mixtures.

### 4.1. (*S*)-2-((*R*)-2-nitro-1-phenylethyl)cyclohexanone (major product).<sup>1</sup>

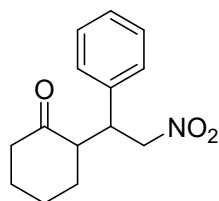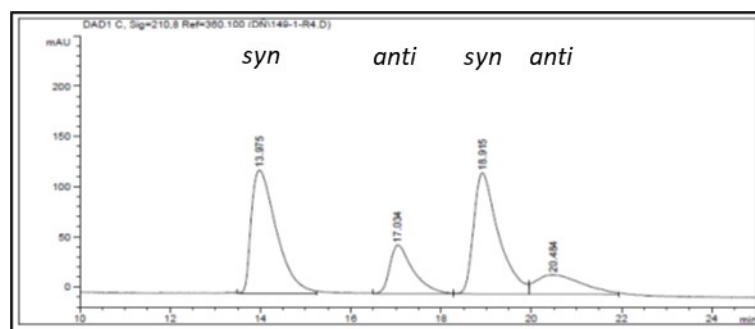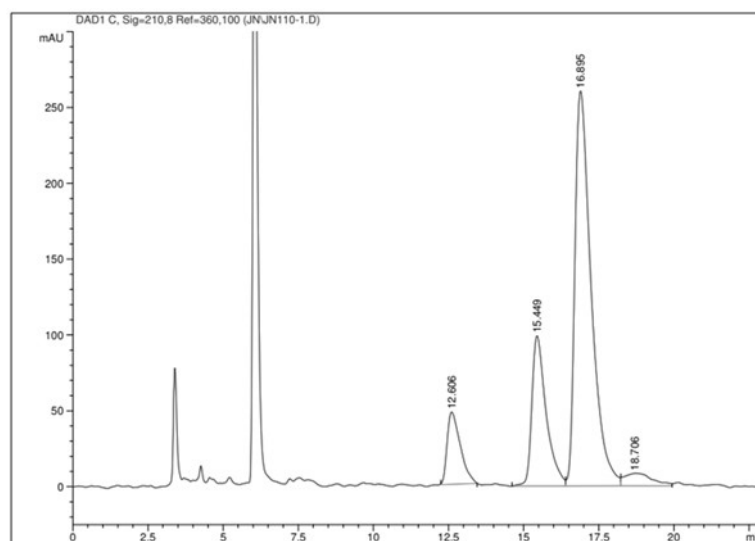

| Peak #   | RetTime [min] | Type | Width [min] | Area [mAU*s] | Height [mAU] | Area %  |
|----------|---------------|------|-------------|--------------|--------------|---------|
| 1        | 12.606        | MM   | 0.5073      | 1451.62292   | 47.69149     | 9.6052  |
| 2        | 15.449        | PV   | 0.4922      | 3277.74731   | 99.00982     | 21.6884 |
| 3        | 16.895        | VB   | 0.5611      | 9846.47070   | 260.43976    | 65.1527 |
| 4        | 18.706        | BV   | 0.7689      | 537.07117    | 8.29995      | 3.5537  |
| Totals : |               |      |             | 1.51129e4    | 415.44101    |         |

4.2. (*S*)-2-((*R*)-1-(4-methoxyphenyl)-2-nitroethyl)cyclohexanone (major product).<sup>1</sup>

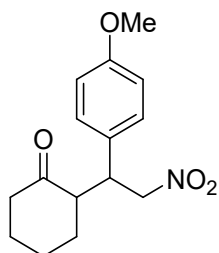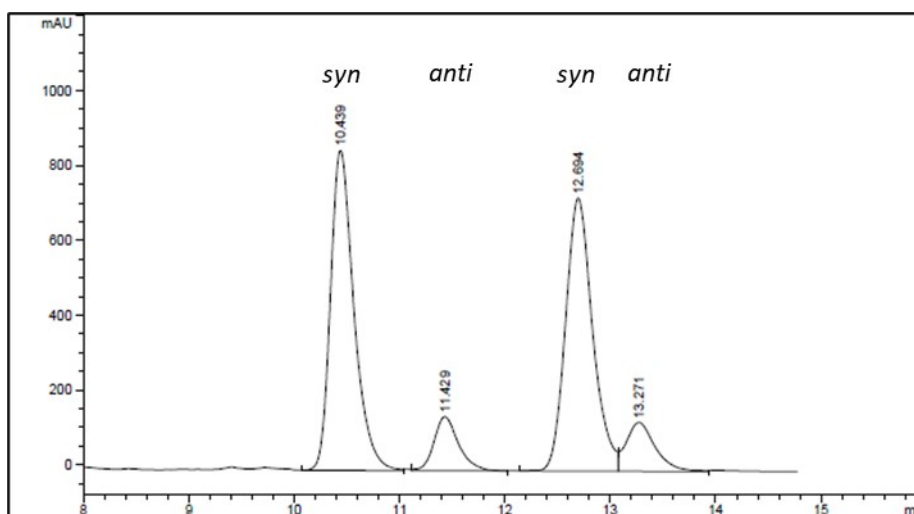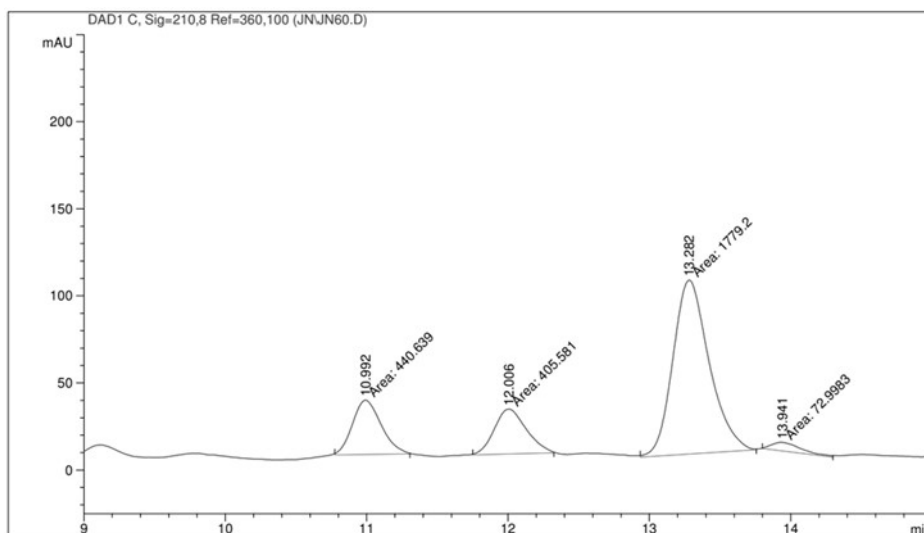

| Peak #   | RetTime [min] | Type | Width [min] | Area [mAU*s] | Height [mAU] | Area %  |
|----------|---------------|------|-------------|--------------|--------------|---------|
| 1        | 10.992        | MM   | 0.2350      | 440.63882    | 31.25068     | 16.3295 |
| 2        | 12.006        | MM   | 0.2621      | 405.58099    | 25.79507     | 15.0303 |
| 3        | 13.282        | MM   | 0.2971      | 1779.20483   | 99.82589     | 65.9350 |
| 4        | 13.941        | MM   | 0.2450      | 72.99831     | 4.96668      | 2.7052  |
| Totals : |               |      |             | 2698.42297   | 161.83832    |         |

4.3. (S)-2-((R)-1-(4-chlorophenyl)-2-nitroethyl)cyclohexanone (major product).<sup>1</sup>

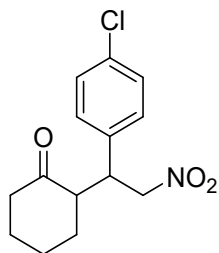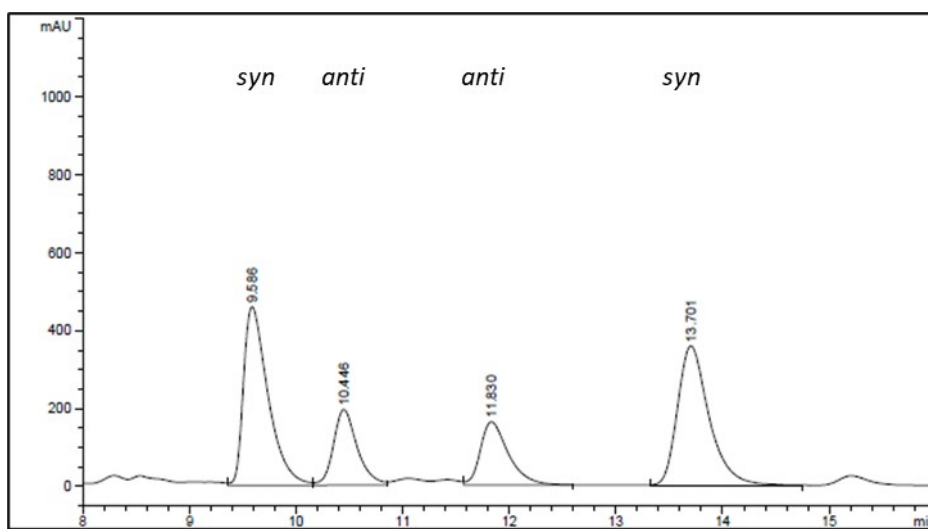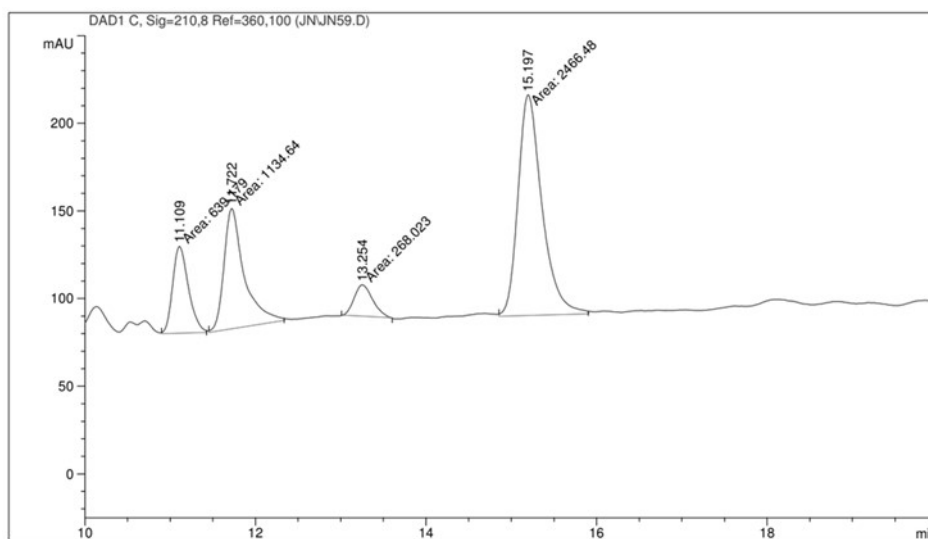

| Peak #   | RetTime [min] | Type | Width [min] | Area [mAU*s] | Height [mAU] | Area %  |
|----------|---------------|------|-------------|--------------|--------------|---------|
| 1        | 11.109        | MM   | 0.2153      | 639.17908    | 49.47757     | 14.1778 |
| 2        | 11.722        | MM   | 0.2756      | 1134.64038   | 68.60476     | 25.1677 |
| 3        | 13.254        | MM   | 0.2497      | 268.02289    | 17.88955     | 5.9451  |
| 4        | 15.197        | MM   | 0.3266      | 2466.47949   | 125.88364    | 54.7095 |
| Totals : |               |      |             | 4508.32184   | 261.85551    |         |



#### 4.4. (S)-2-((R)-2-Nitro-1-phenylethyl)cyclohexanone (major product).<sup>1</sup>

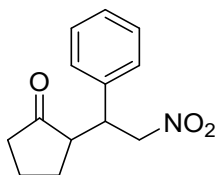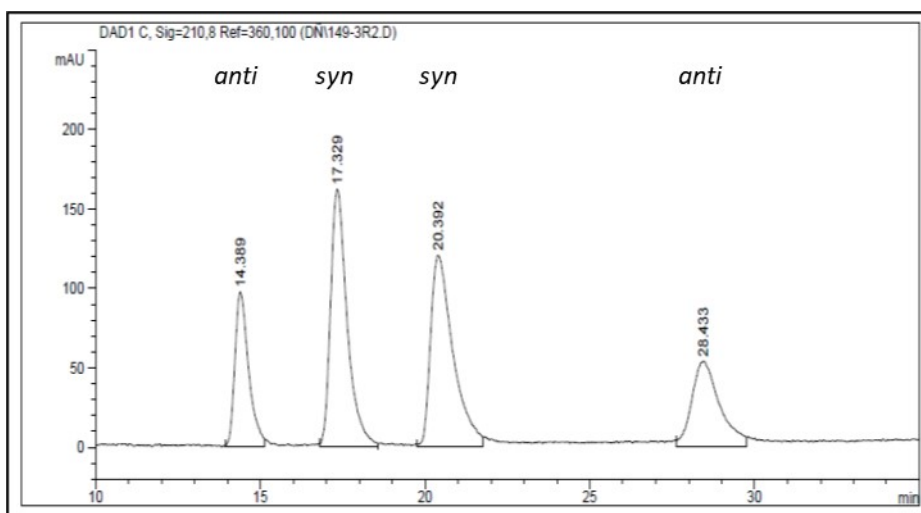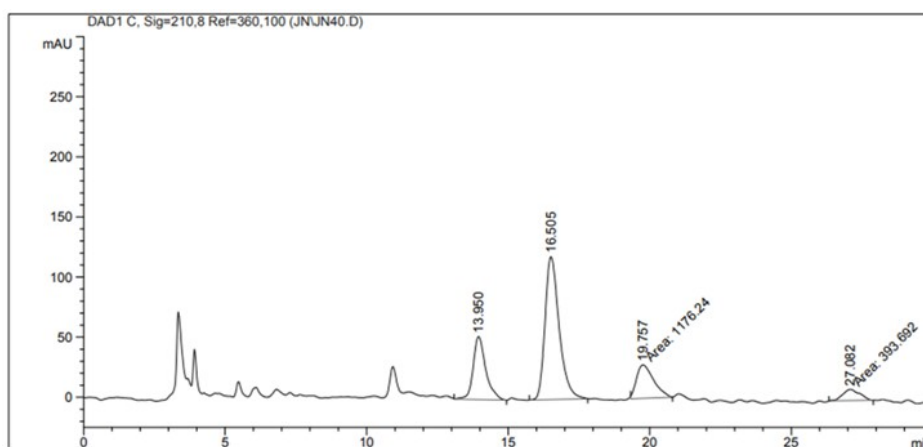

| Peak # | RetTime [min] | Type | Width [min] | Area [mAU*s] | Height [mAU] | Area %  |
|--------|---------------|------|-------------|--------------|--------------|---------|
| 1      | 13.950        | VP   | 0.4729      | 1635.98901   | 52.59710     | 22.2802 |
| 2      | 16.505        | BB   | 0.5260      | 4136.86768   | 118.88335    | 56.3392 |
| 3      | 19.757        | MM   | 0.7021      | 1176.23901   | 27.92154     | 16.0190 |
| 4      | 27.082        | PP   | 0.7013      | 393.69220    | 9.35669      | 5.3616  |

Totals : 7342.78790 208.75868

## 5. In situ NMR mechanistic studies: Oxazolidine intermediate formation.

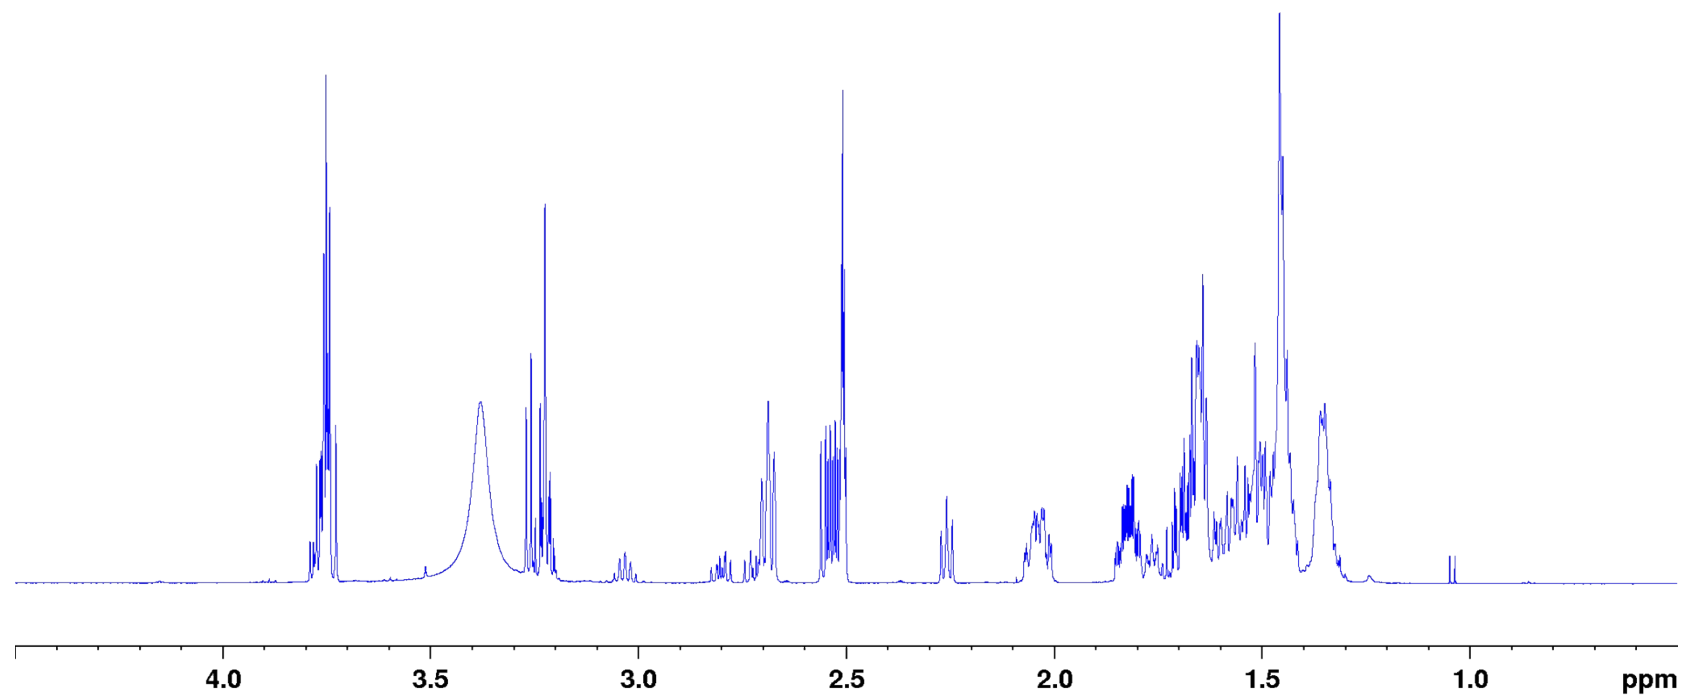

$^1\text{H}$  NMR of the reaction between L-Prolinol and cyclohexanone obtained after 20 h.

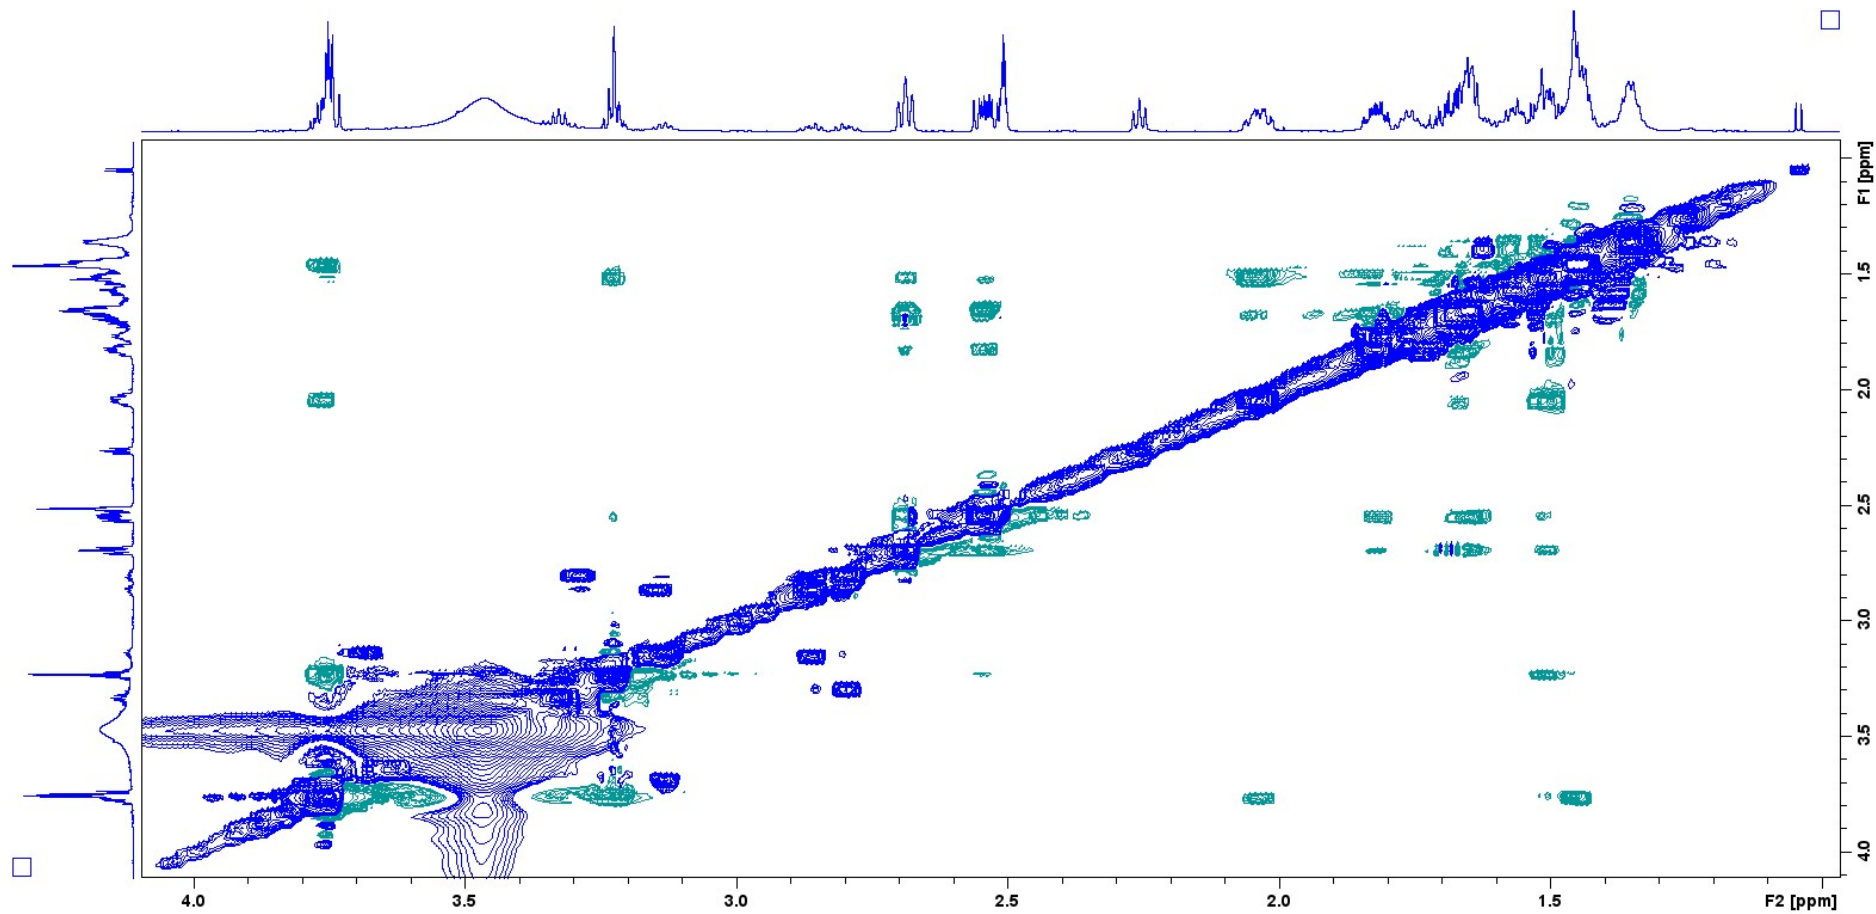

2D  $^1\text{H},^1\text{H}$  gNOESY spectrum of the reaction between L-Prolinol and cyclohexanone obtained after 20 h.

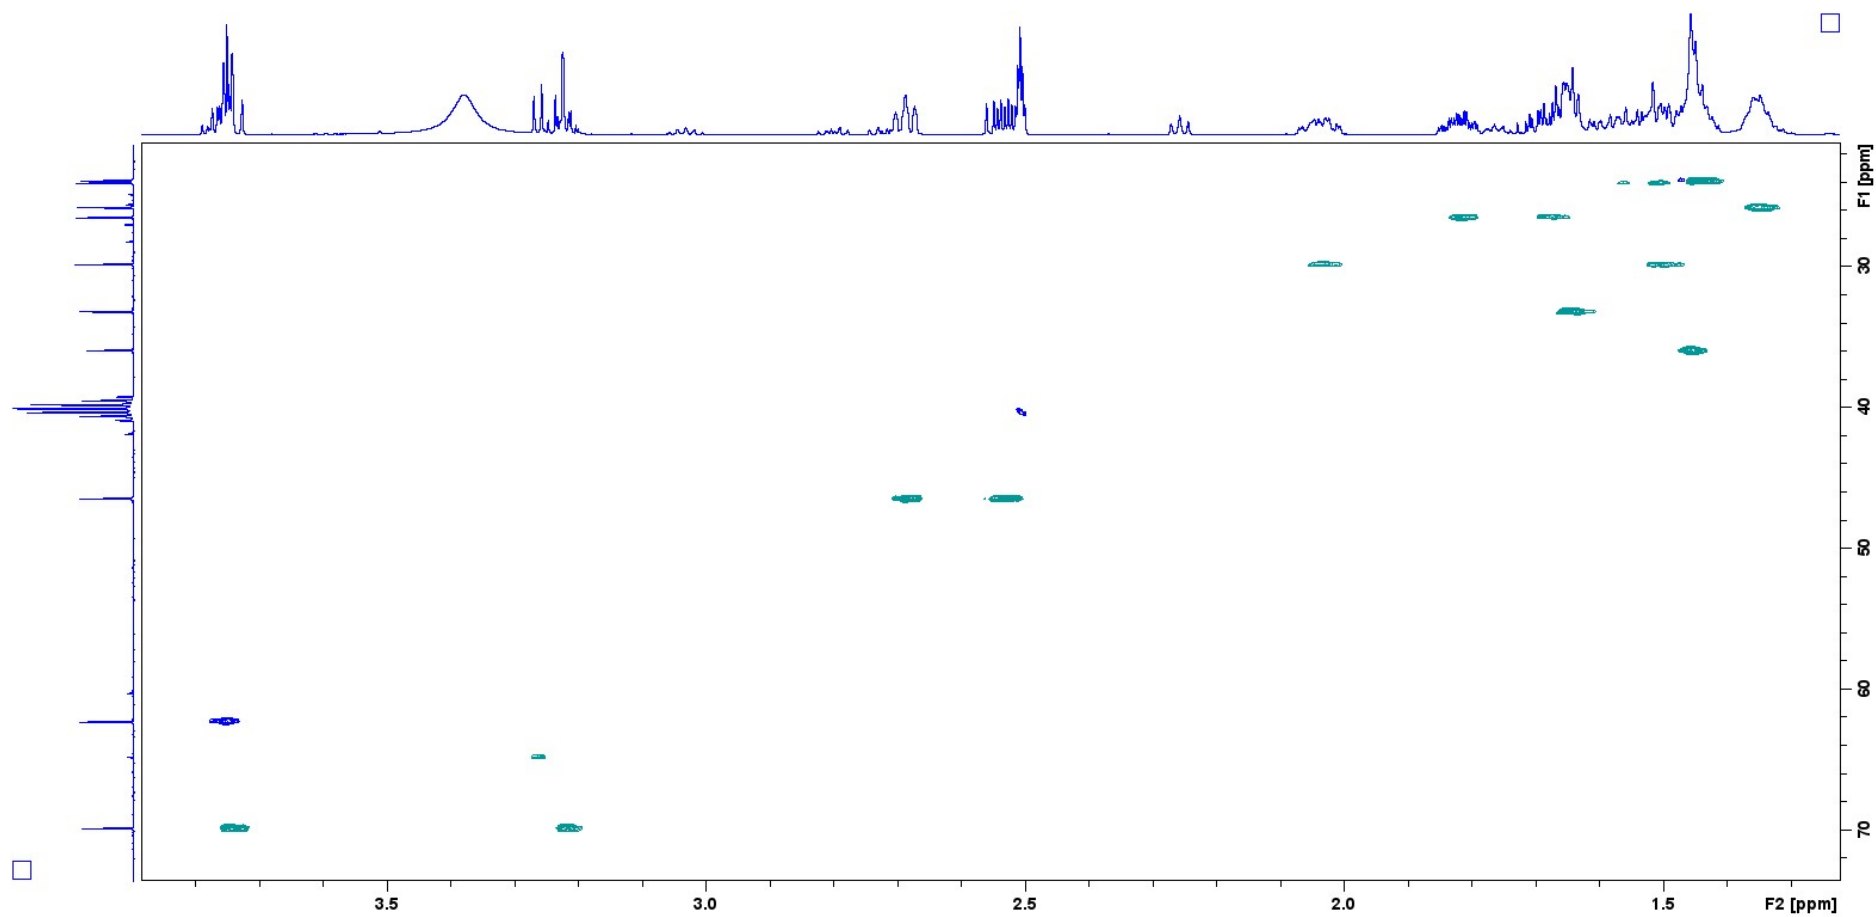

2D Edited  $^1\text{H}$ ,  $^{13}\text{C}$  gHSQC of the reaction between L-Prolinol and cyclohexanone obtained after 20 h.

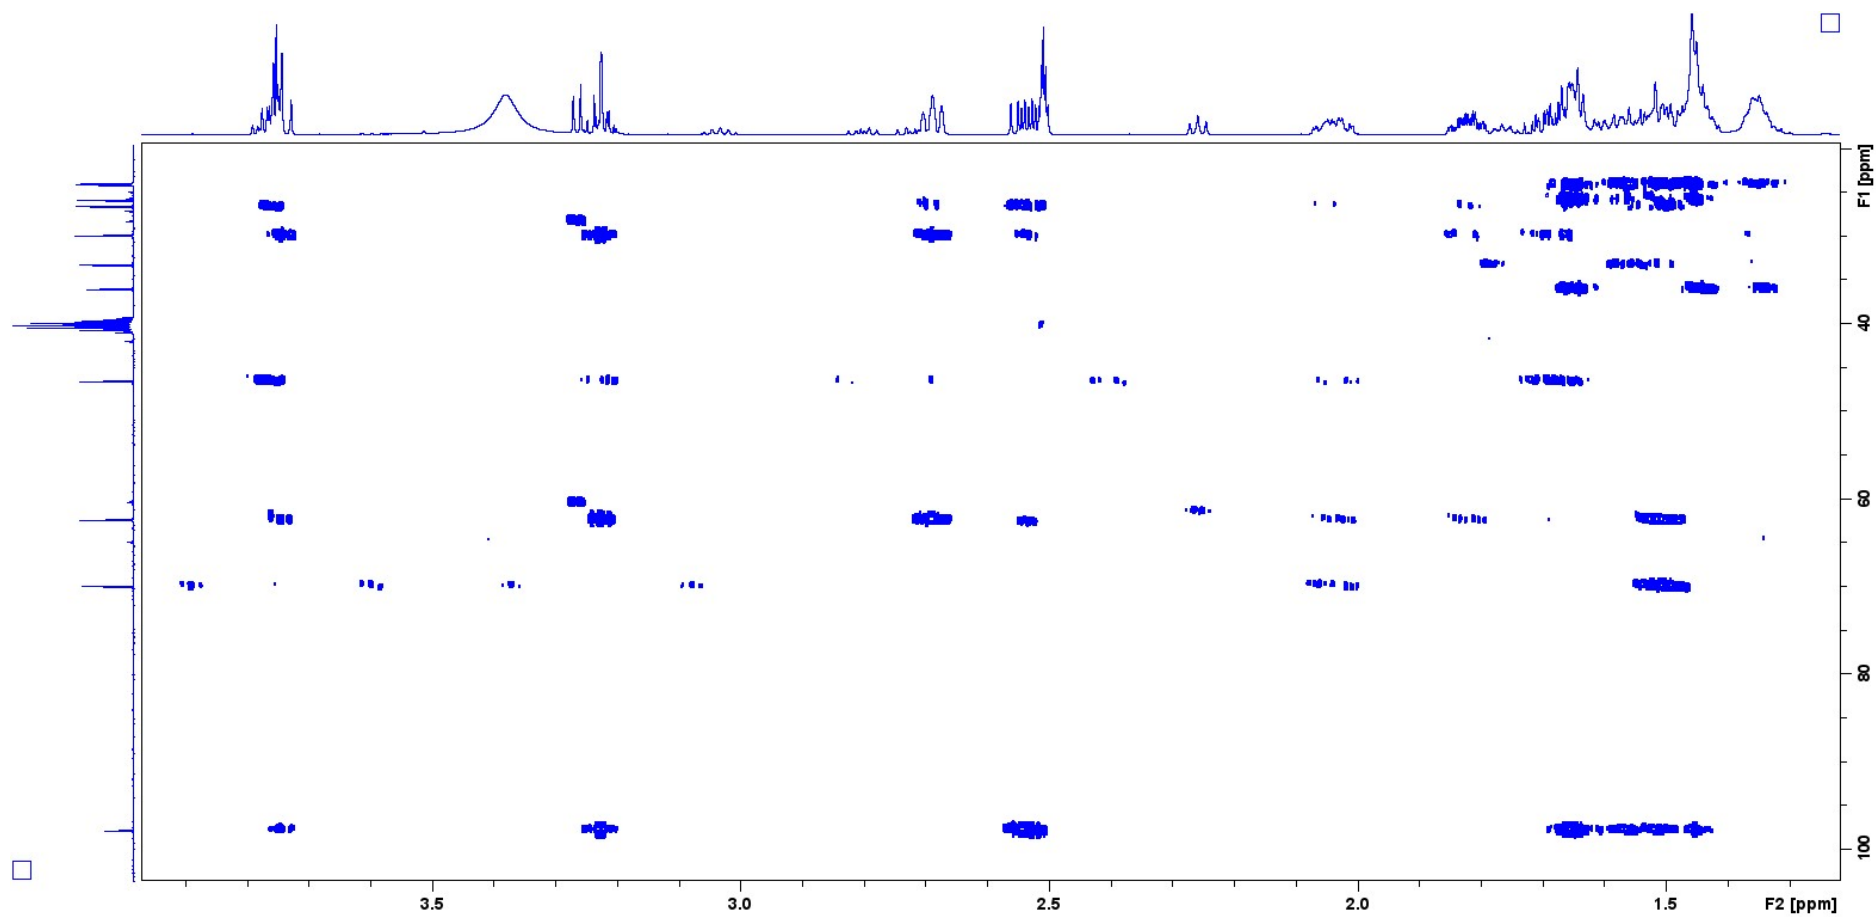

2D  $^1\text{H},^{13}\text{C}$  gHMBC of the reaction between L-Prolinol and cyclohexanone obtained after 20 h.

## 6. References.

1 A. Martinez-Cuezva, M. Marin-Luna, D. A. Alonso, D. Ros-Niguez, M. Alajarin, J. Berna, *Org. Lett.*, 2019, **21**, 5192-5196.
